# Supplementary material for: A quinazoline derivative as quick-response red-shifted reporter for nanomolar Al3+and applicable to living cell staining
Source: Royal Society of Chemistry journal article supplement (doi:10.1039/c4ra10836a), 2014-01-01
Supplement: c4ra10836a1.pdf [file c4ra10836a1.pdf]

## *Supporting Information*

### **For**

### **A quinazoline derivative as quick-response red-shifted reporter for nanomolar Al<sup>3+</sup> ions and applicable to living cell staining**

*Manjira Mukherjee,<sup>a</sup> Buddhadeb Sen,<sup>a</sup> Siddhartha Pal,<sup>a</sup> Somenath lohar,<sup>a</sup> Samya Banerjee<sup>b</sup> and Pabitra Chattopadhyay<sup>a\*</sup>*

<sup>a</sup>*Department of Chemistry, Burdwan University, Golapbag, Burdwan-713104, West Bengal, India, E-mail: [pabitracc@yahoo.com](mailto:pabitracc@yahoo.com)*

<sup>b</sup>*Department of Inorganic and Physical Chemistry, Indian Institute of Science, Bangalore, 560012, India*

## **CONTENTS**

1. **Fig. S1** <sup>1</sup>H NMR spectrum of **L** in DMSO-d<sub>6</sub>
2. **Fig.S2** <sup>13</sup>C NMR spectrum of **L** in DMSO-d<sub>6</sub>
3. **Fig. S3** Mass spectrum of **L**
4. **Fig. S4** IR spectrum of **L**
5. **Fig. S5** <sup>13</sup>CNMR spectrum of aluminium(III) complex of **L** in DMSO-d<sub>6</sub>
6. **Fig. S6** <sup>1</sup>H NMR spectrum of aluminium(III) complex of **L** in DMSO-d<sub>6</sub>
7. **Fig.S7** Mass spectrum of the aluminium(III) complex
8. **Fig. S8** IR spectrum of the aluminium(III) complex
9. **Fig. S9** Absorption and emission spectra of 10 μM of the probe in 100 mM HEPES buffer (DMSO/water 1:9, v/v) at 27°C
10. **Fig.S10** Emission spectra of **L** at different solvent
11. **Fig.S11** Fluorescence intensity of **L** in presence of different cations
12. **Fig. S12** Change of relative fluorescence intensity profile of **L** in presence of different cations
13. **Table S1** Life time details of **L**
14. **Fig. S13** Time-resolved fluorescence decay of **L** (10 mM) in the absence and presence of added Al<sup>3+</sup> (5 mM and 10 mM) (at λ<sub>ex</sub> = 405 nm) in 100 mM HEPES buffer (DMSO/ water: 1/9, v/v) [λ<sub>em</sub>: 450 nm].

15. **Fig. S14**  $^1\text{H}$ NMR titration of **L**

16. **Fig. S15** Fluorescence response to pH of **L** (10  $\mu\text{M}$ ) in absence and in presence of  $\text{Al}^{3+}$  (one equivalent) at different pH in 100 mM HEPES buffer (DMSO/ water: 1/9) at 27  $^\circ\text{C}$ .

17. **Fig. S16** Fluorescence image of MCF-7 cell

18. **Fig. S17** Cytotoxic effect of **L**

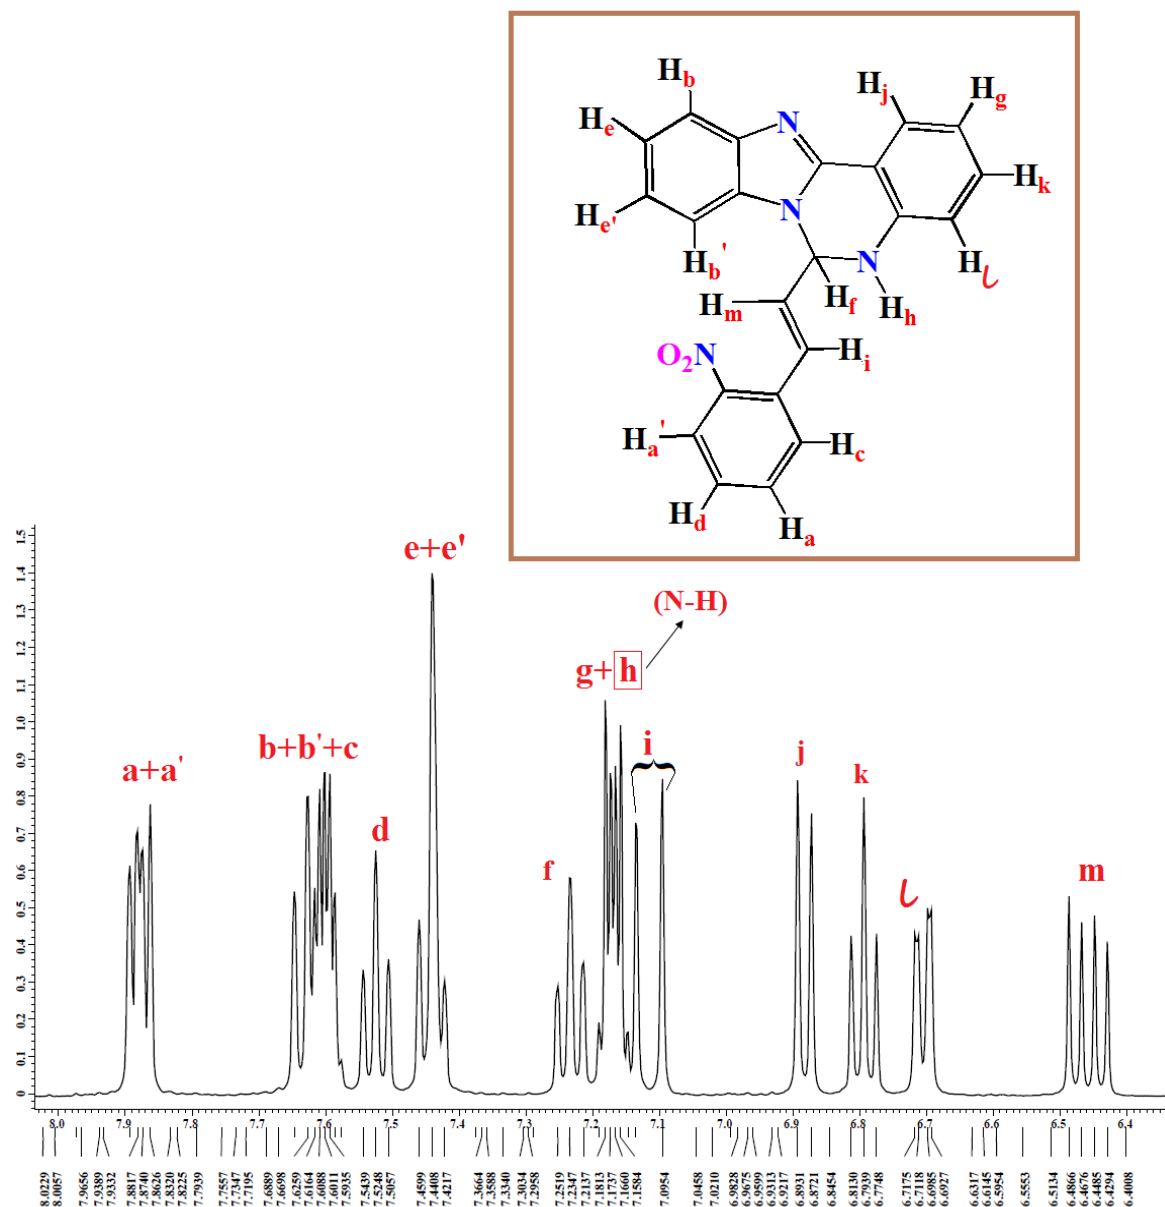

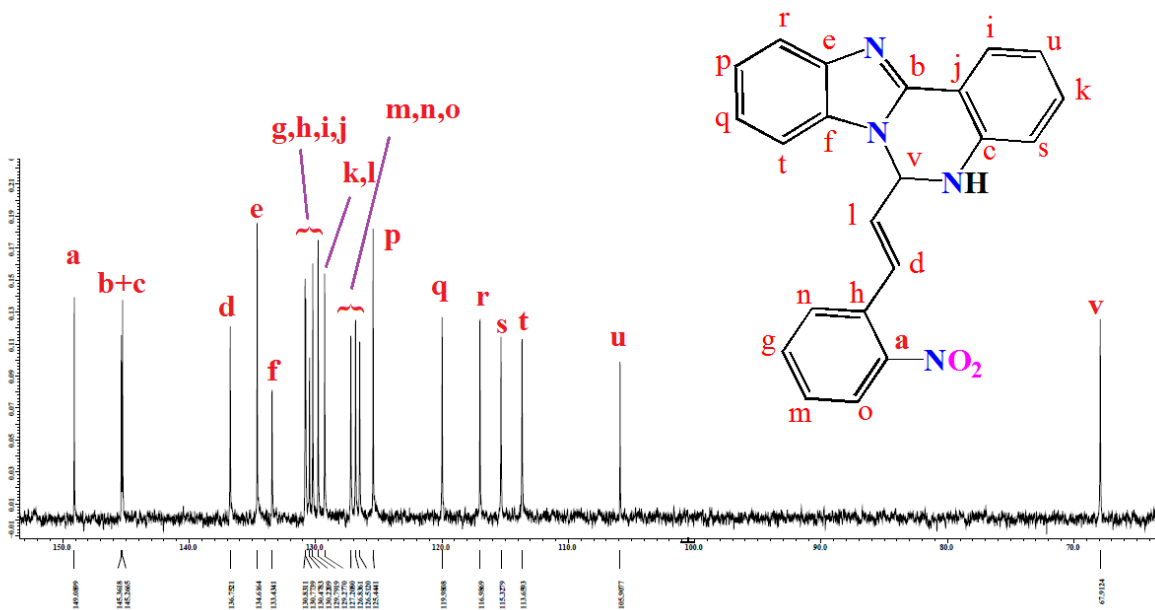

Fig. S2 <sup>13</sup>C NMR spectrum of L in DMSO-d<sub>6</sub>

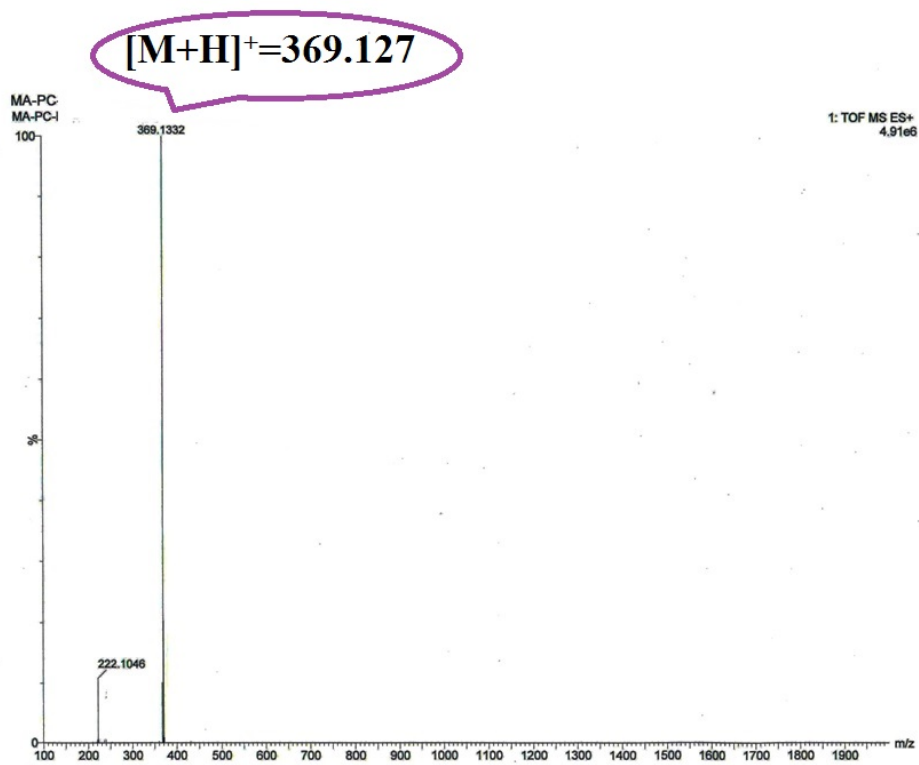

Fig.S3 Mass spectrum of L

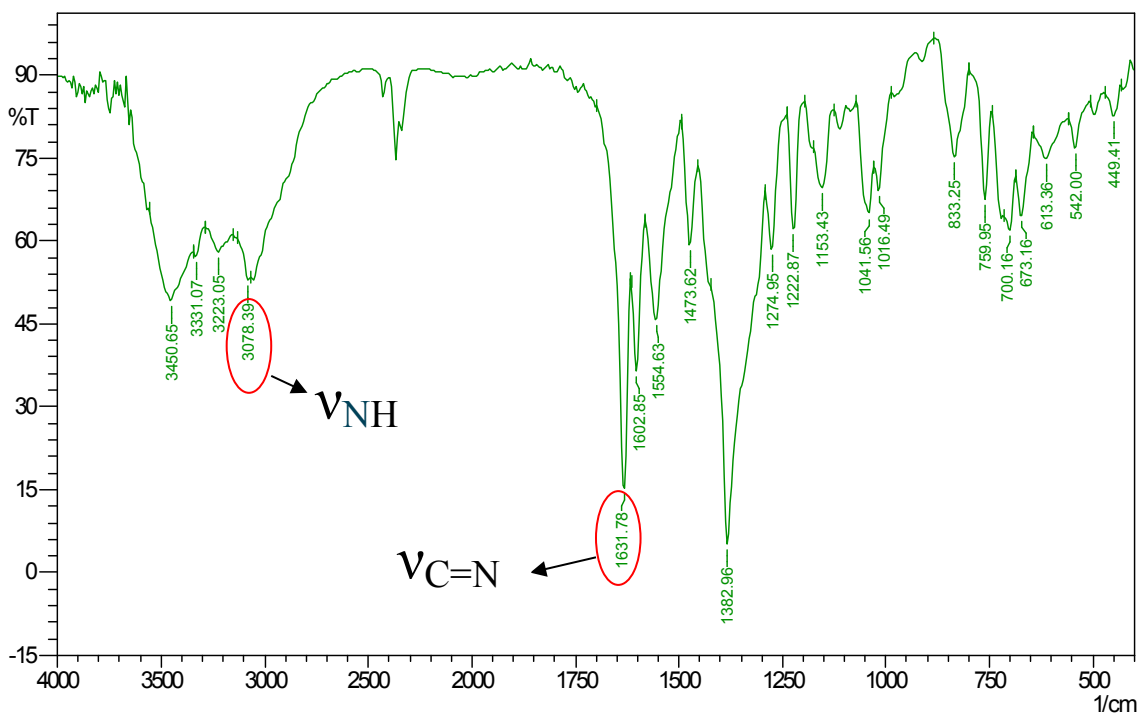

Fig. S4 IR spectrum of L

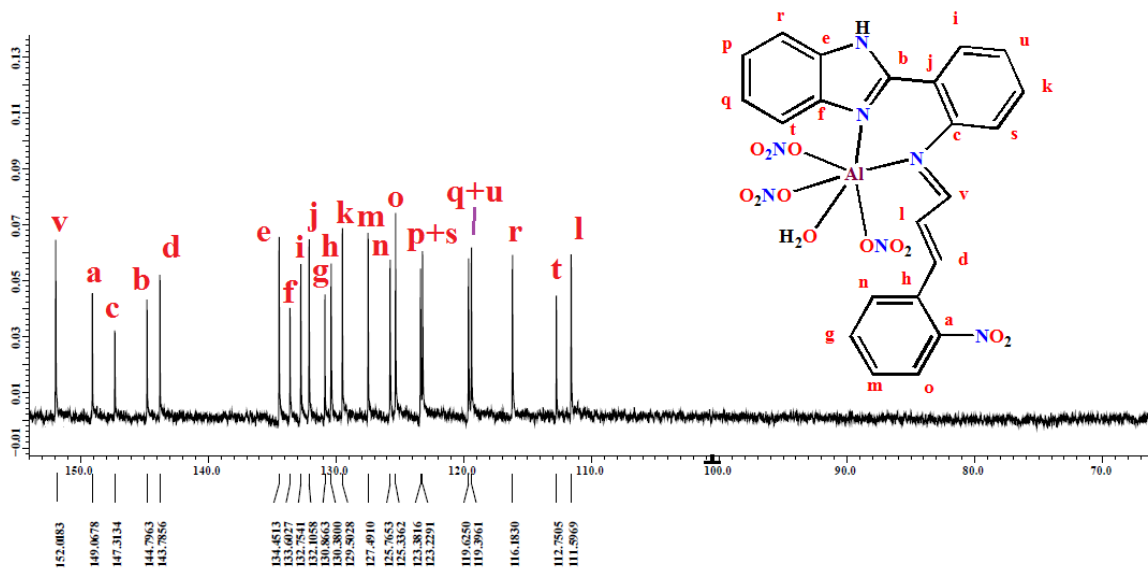

Fig. S5  $^{13}\text{C}$ NMR spectrum of aluminium(III) complex of L in  $\text{DMSO-d}_6$

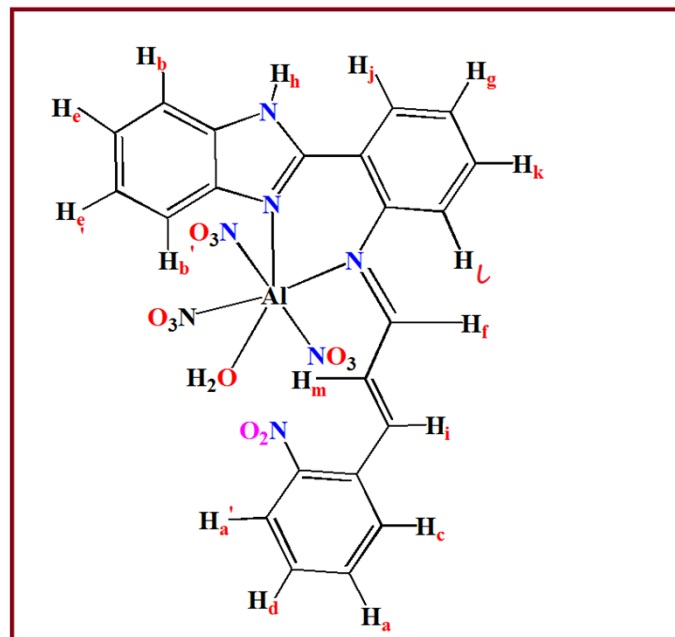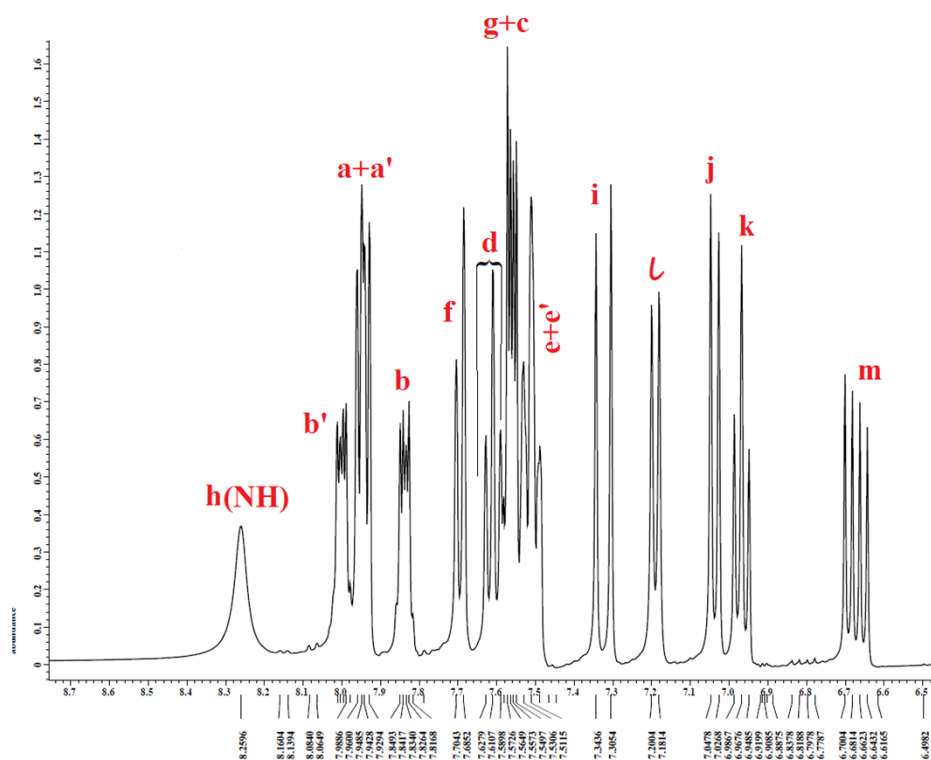

Fig. S6  $^1\text{H}$  NMR spectrum of  $\text{Al}^{3+}$  complex of L in  $\text{DMSO-d}_6$

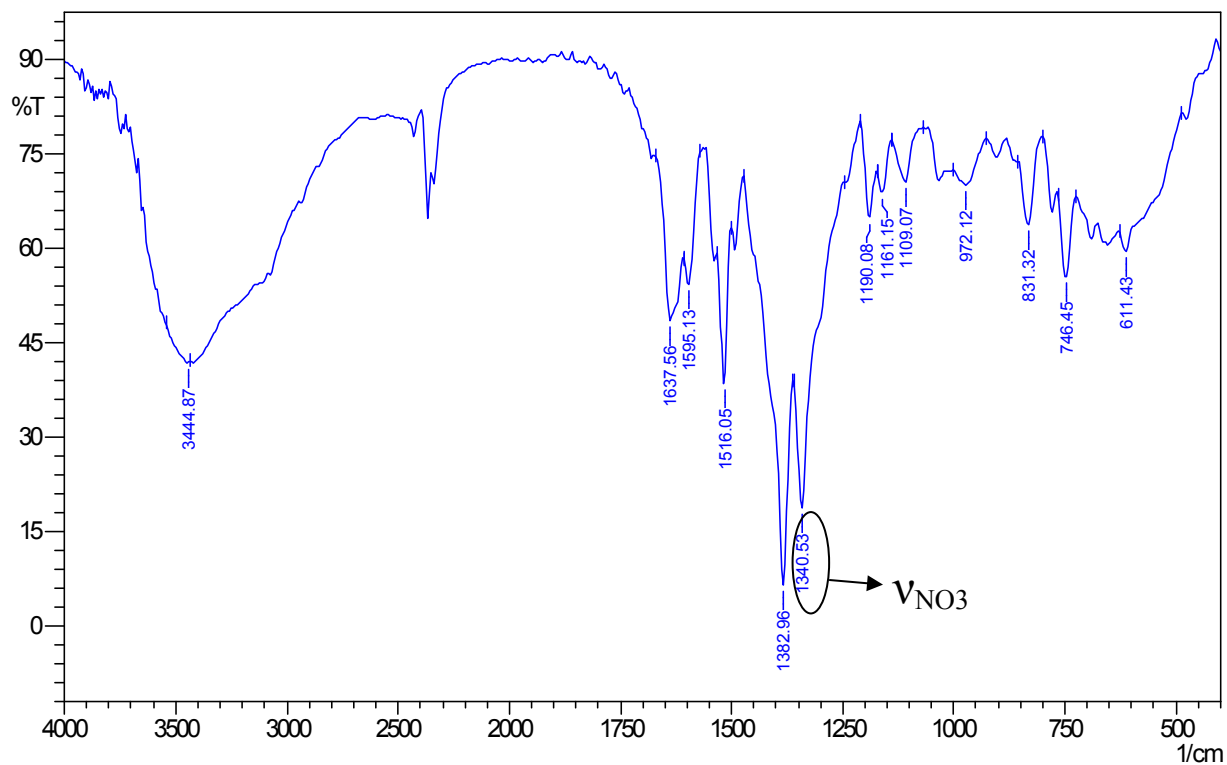

Fig. S7 IR spectrum of aluminium(III) complex

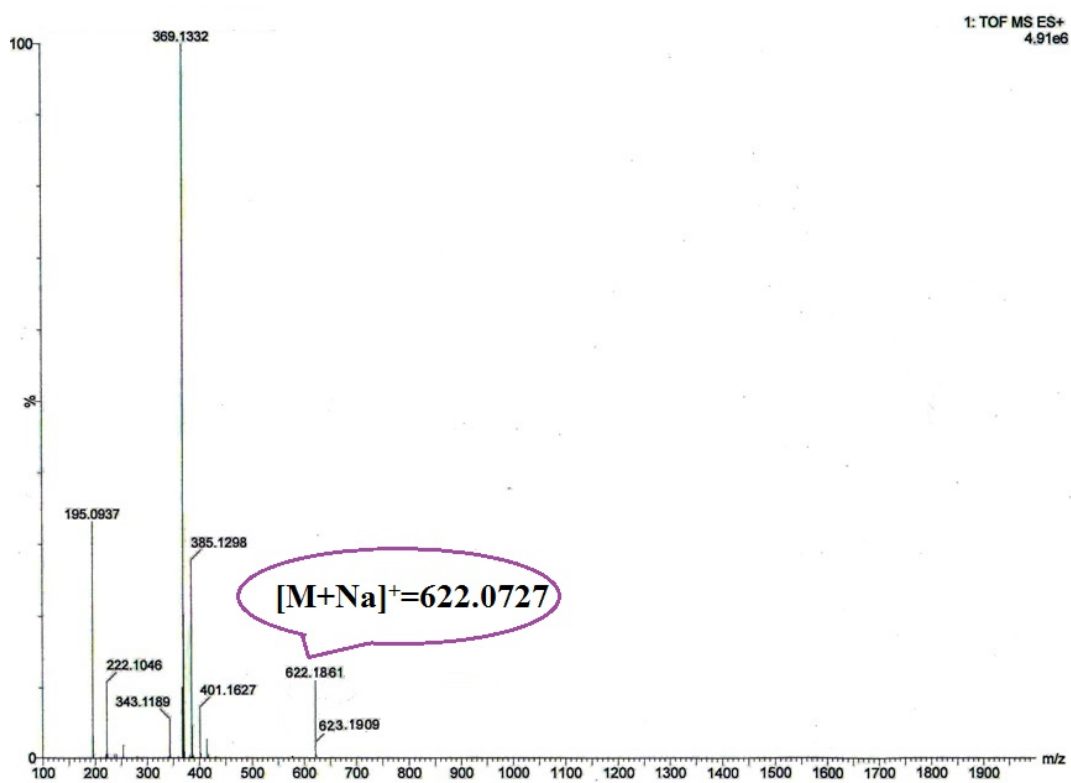

Fig.S8 Mass spectrum of aluminium(III) complex

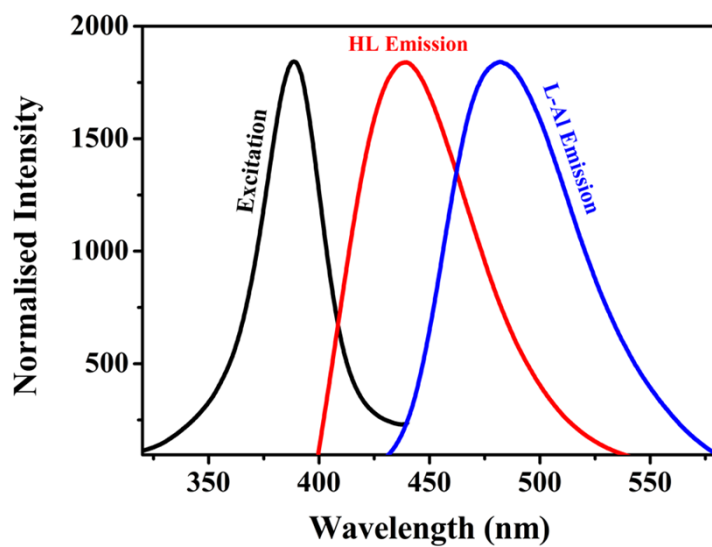

**Fig.S9** Absorption and emission spectra of 10  $\mu\text{M}$  of the probe in 100 mM HEPES buffer (DMSO/water 1:9, v/v) at 27°C

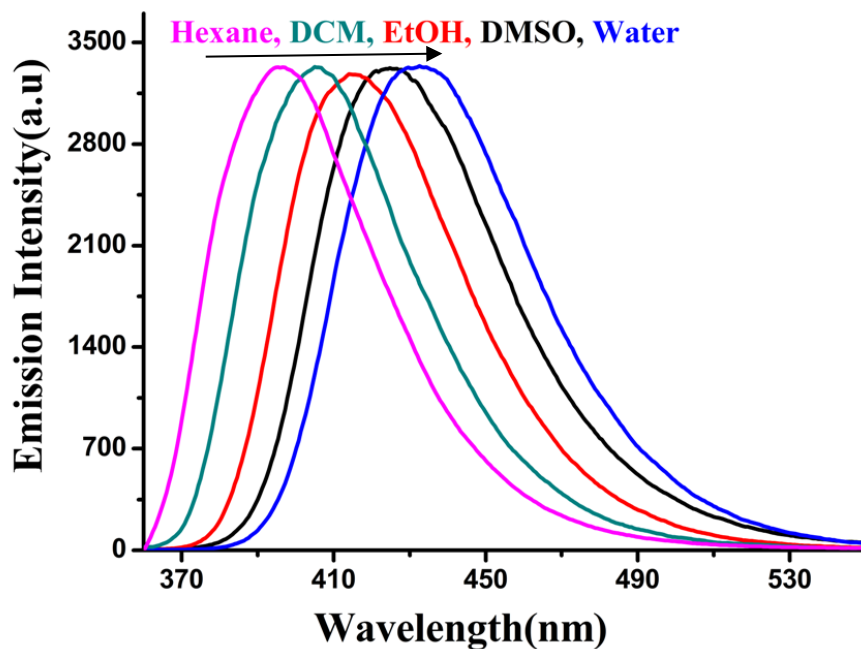

**Fig. S10** Emission spectra of L at different solvent

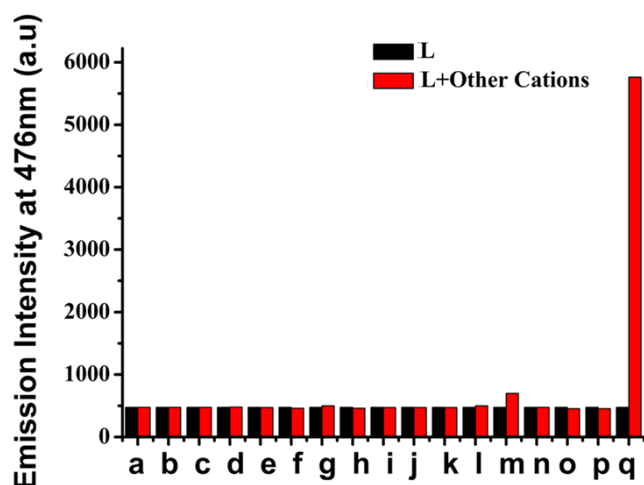

**Fig. S11** Fluorescence intensity of L in presence of different cations in HEPES buffer (100 mM, pH 7.4; DMSO/water: 1/9, v/v) at 25 °C, (a) Na<sup>+</sup>, (b) K<sup>+</sup>, (c) Mn<sup>2+</sup>, (d) Pb<sup>2+</sup>, (e) Hg<sup>2+</sup>, (f) Cu<sup>2+</sup>, (g) Cr<sup>3+</sup>, (h) Cd<sup>2+</sup>, (i) Ni<sup>2+</sup>, (j) Mg<sup>2+</sup>, (k) Co<sup>2+</sup>, (l) Fe<sup>2+</sup>, (m) Fe<sup>3+</sup>, (n) Ca<sup>2+</sup>, (o) Zn<sup>2+</sup>, (p) Ag<sup>+</sup>, (q) Al<sup>3+</sup>

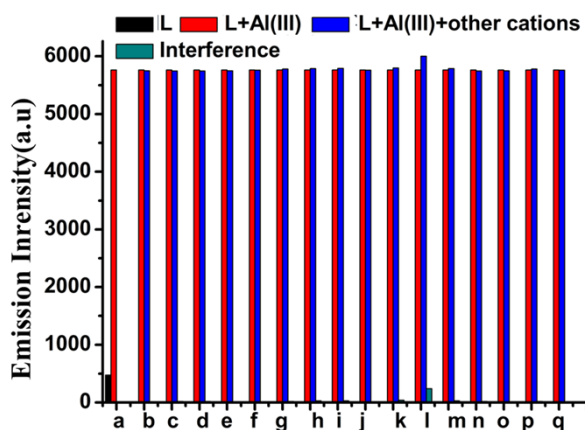

**Fig. S12** Change of relative fluorescence intensity profile of L in presence of different cations in HEPES buffer (100 mM, pH 7.4; DMSO/water: 1/9, v/v) at 25 °C, (a) L, (b) Mn<sup>2+</sup>, (c) Pb<sup>2+</sup>, (d) Hg<sup>2+</sup>, (e) Cu<sup>2+</sup>, (f) Cr<sup>3+</sup>, (g) Cd<sup>2+</sup>, (h) Ni<sup>2+</sup>, (i) Mg<sup>2+</sup>, (j) Co<sup>2+</sup>, (k) Fe<sup>2+</sup>, (l) Fe<sup>3+</sup>, (m) Ca<sup>2+</sup>, (n) Zn<sup>2+</sup>, (o) Ag<sup>+</sup>, (p) Na<sup>+</sup>, (q) K<sup>+</sup>



Table S1 Life time details of L

|                                        | $B_1$ | $B_2$ | $T_1$<br>(ns) | $T_2$<br>(ns) | $T_{av}$<br>(ns) | $\chi^2$ | $\phi$ | $K_r$  | $K_{nr}$ | $K_r/K_{nr}$ |
|----------------------------------------|-------|-------|---------------|---------------|------------------|----------|--------|--------|----------|--------------|
| <b>L</b>                               | 85    | 15    | 9             | 2             | 7.93             | 0.99     | 0.069  | 0.0087 | 0.1174   | 0.074        |
| <b>L + Al<sup>3+</sup><br/>(1:0.5)</b> | 49    | 51    | 11            | 1.65          | 6.23             | 1.07     | -      | -      | -        | -            |
| <b>L + Al<sup>3+</sup><br/>(1:1)</b>   | 27    | 73    | 11.22         | 1.64          | 4.22             | 0.99     | 0.708  | 0.1677 | 0.069    | 2.26         |

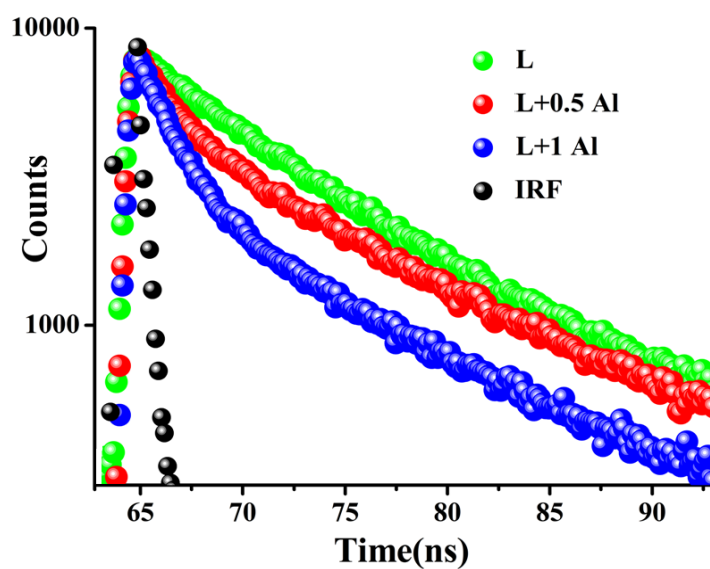

**Fig. S13** Time-resolved fluorescence decay of L (10 mM) in the absence and presence of added Al<sup>3+</sup> ions (5 mM ,10 mM and 15 mM) (at  $\lambda_{ex} = 380$  nm) in 100 mM HEPES buffer (DMSO/ water: 1/9, v/v) [ $\lambda_{em}$ : 476 nm].

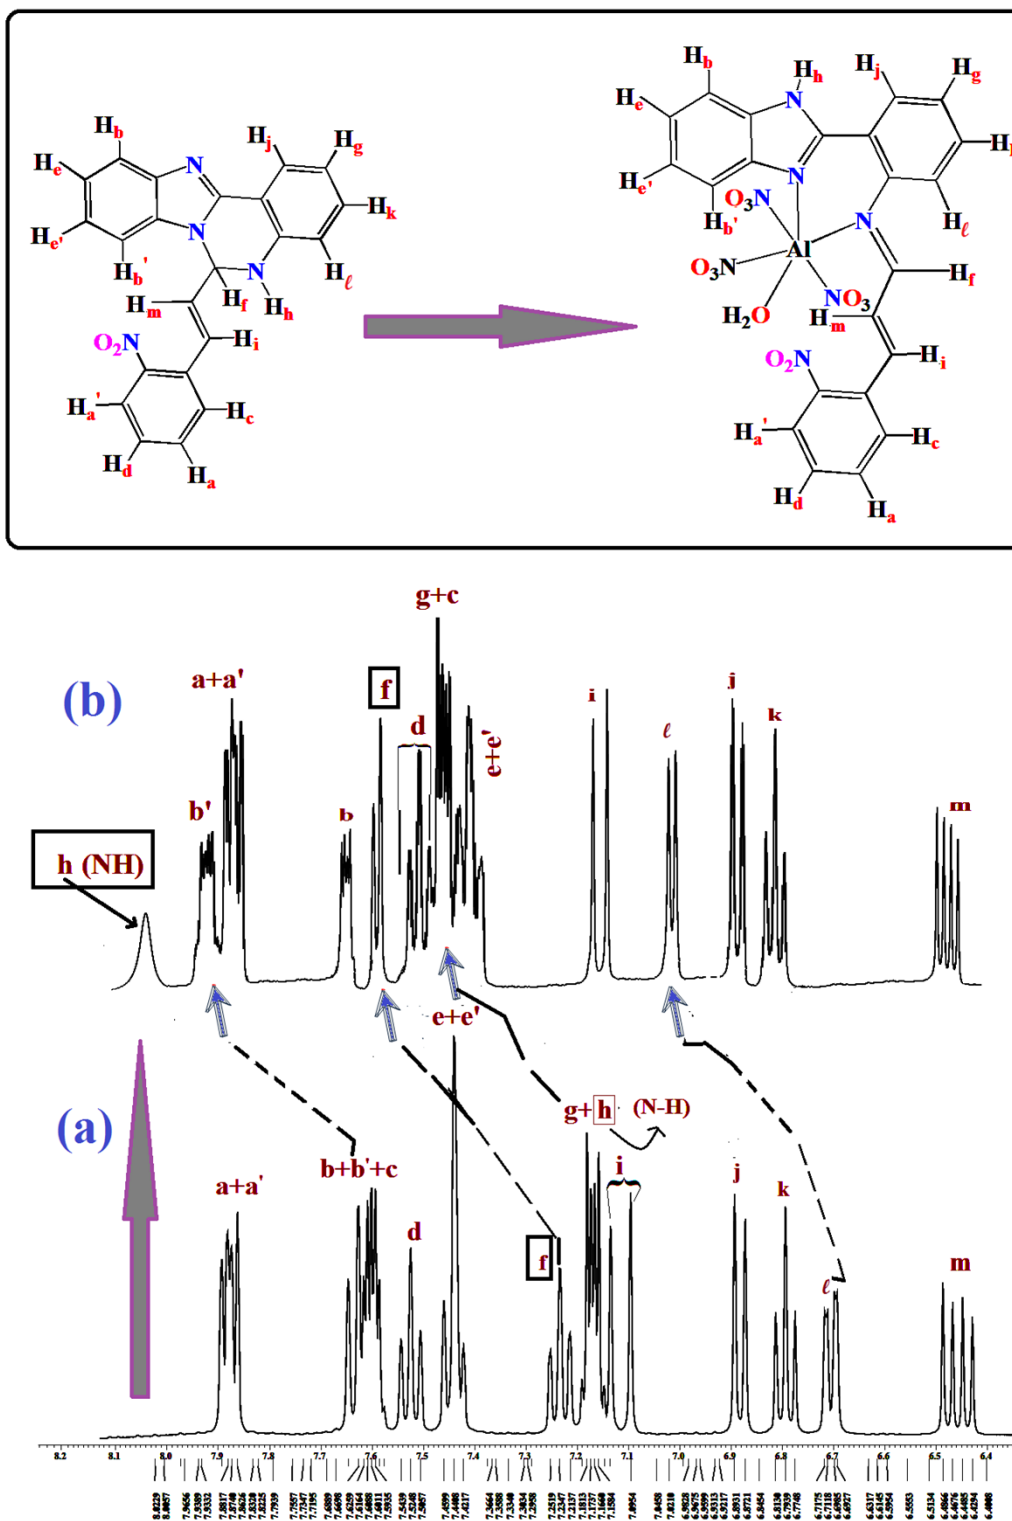

Fig. S14  $^1\text{H}$ NMR titration of **L** in  $\text{DMSO-d}_6$  (a)  $0 \mu\text{M}$  (b)  $10 \mu\text{M}$   $\text{Al}^{3+}$  ions

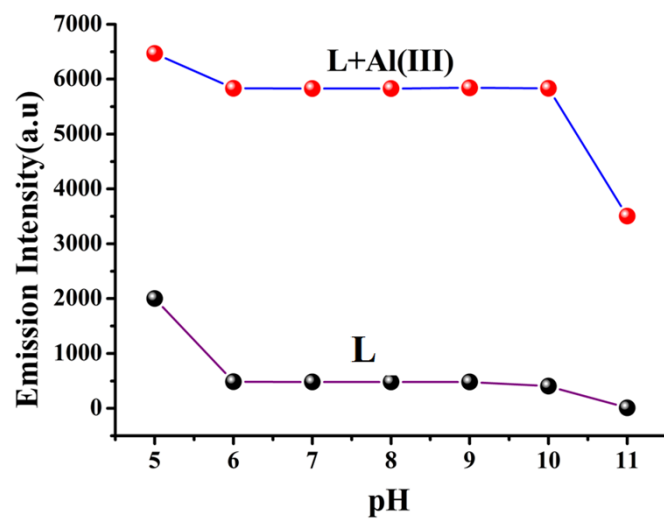

**Fig. S15** Fluorescence response to pH of **L** (10  $\mu$ M) in absence and in presence of  $\text{Al}^{3+}$  (one equivalent) at different pH in 100 mM HEPES buffer (DMSO/ water: 1/9) at 27  $^{\circ}\text{C}$ .

## Fluorescence Image

## Phase contrast

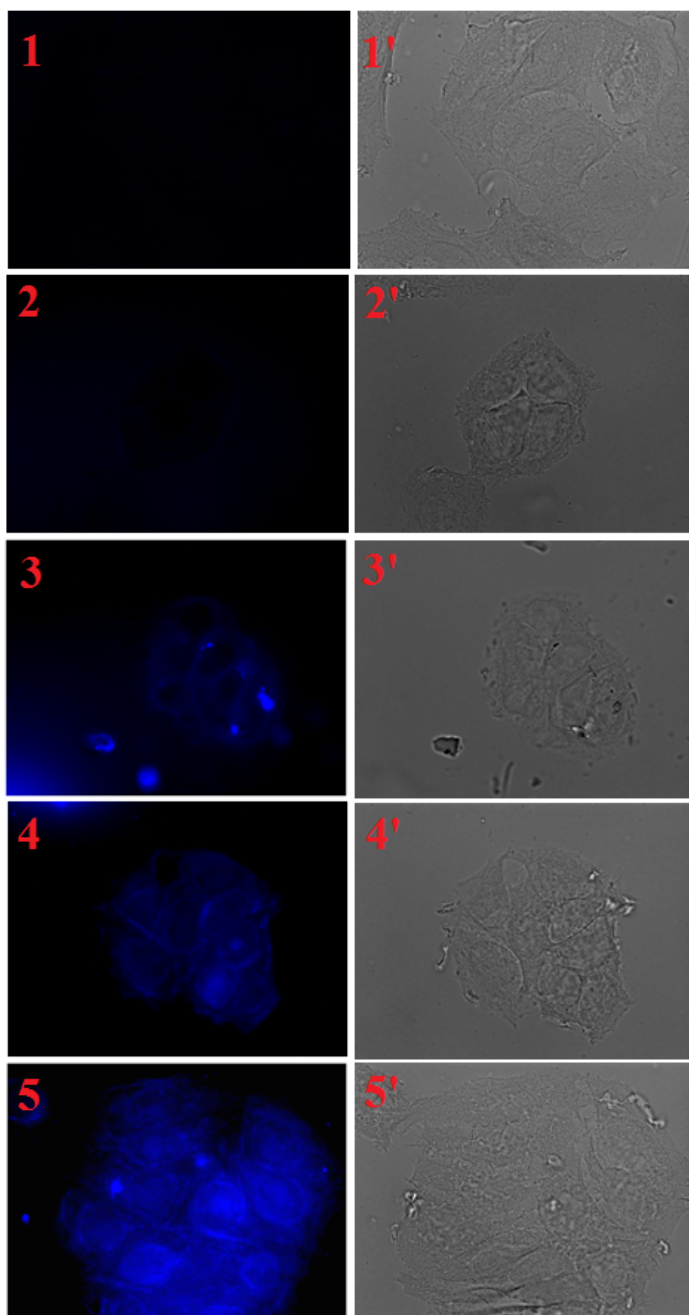

**Fig. S16** Fluorescence image of MCF-7 cell (1) Control (2) Cells were incubated with  $0 \mu\text{M Al}^{3+}$  (3) cells incubated with  $2 \mu\text{M Al}^{3+}$  (4)  $5 \mu\text{M Al}^{3+}$  and (5)  $10 \mu\text{M Al}^{3+}$ . All the samples were excited at 380 nm with emission 476 nm by using a [10 X] objective.

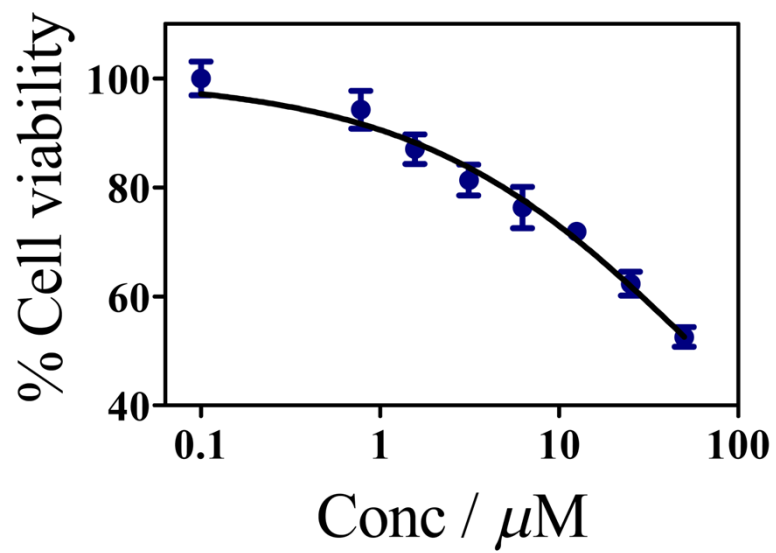

Fig. S17 Cytotoxic effect of L ( $\text{IC}_{50} > 50 \mu\text{M}$ )
